# Supplementary material
Source: publisher figshare collection journal article supplement (https://geolsoc.figshare.com/articles/dataset/_/3454847)
Supplement: Supplementary file 4 [file 1]

KEY:

General:

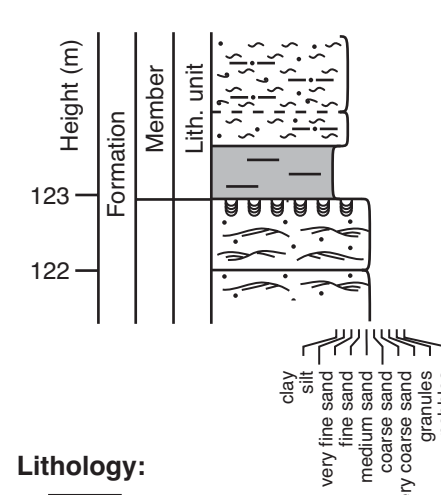

- Lithology:**
- Claystone
  - Siltstone
  - Sandstone, locally volcanoclastic
  - Limestone
  - Carbonate concretions
  - Pebbles

- Trace Fossils:**
- Bioturbation (undifferentiated)
  - Thalassinoides

- Body Fossils:**
- Shell concentration
  - Ammonites
  - Fossil wood

Arroyo Lapa, Neuquén, Argentina  
 Hesselbo notebook 26.3.08 - 28.3.08  
 Samples collected by: Al-Suwaidi, Damborenea, Hesselbo, Jenkyns, Manceñido

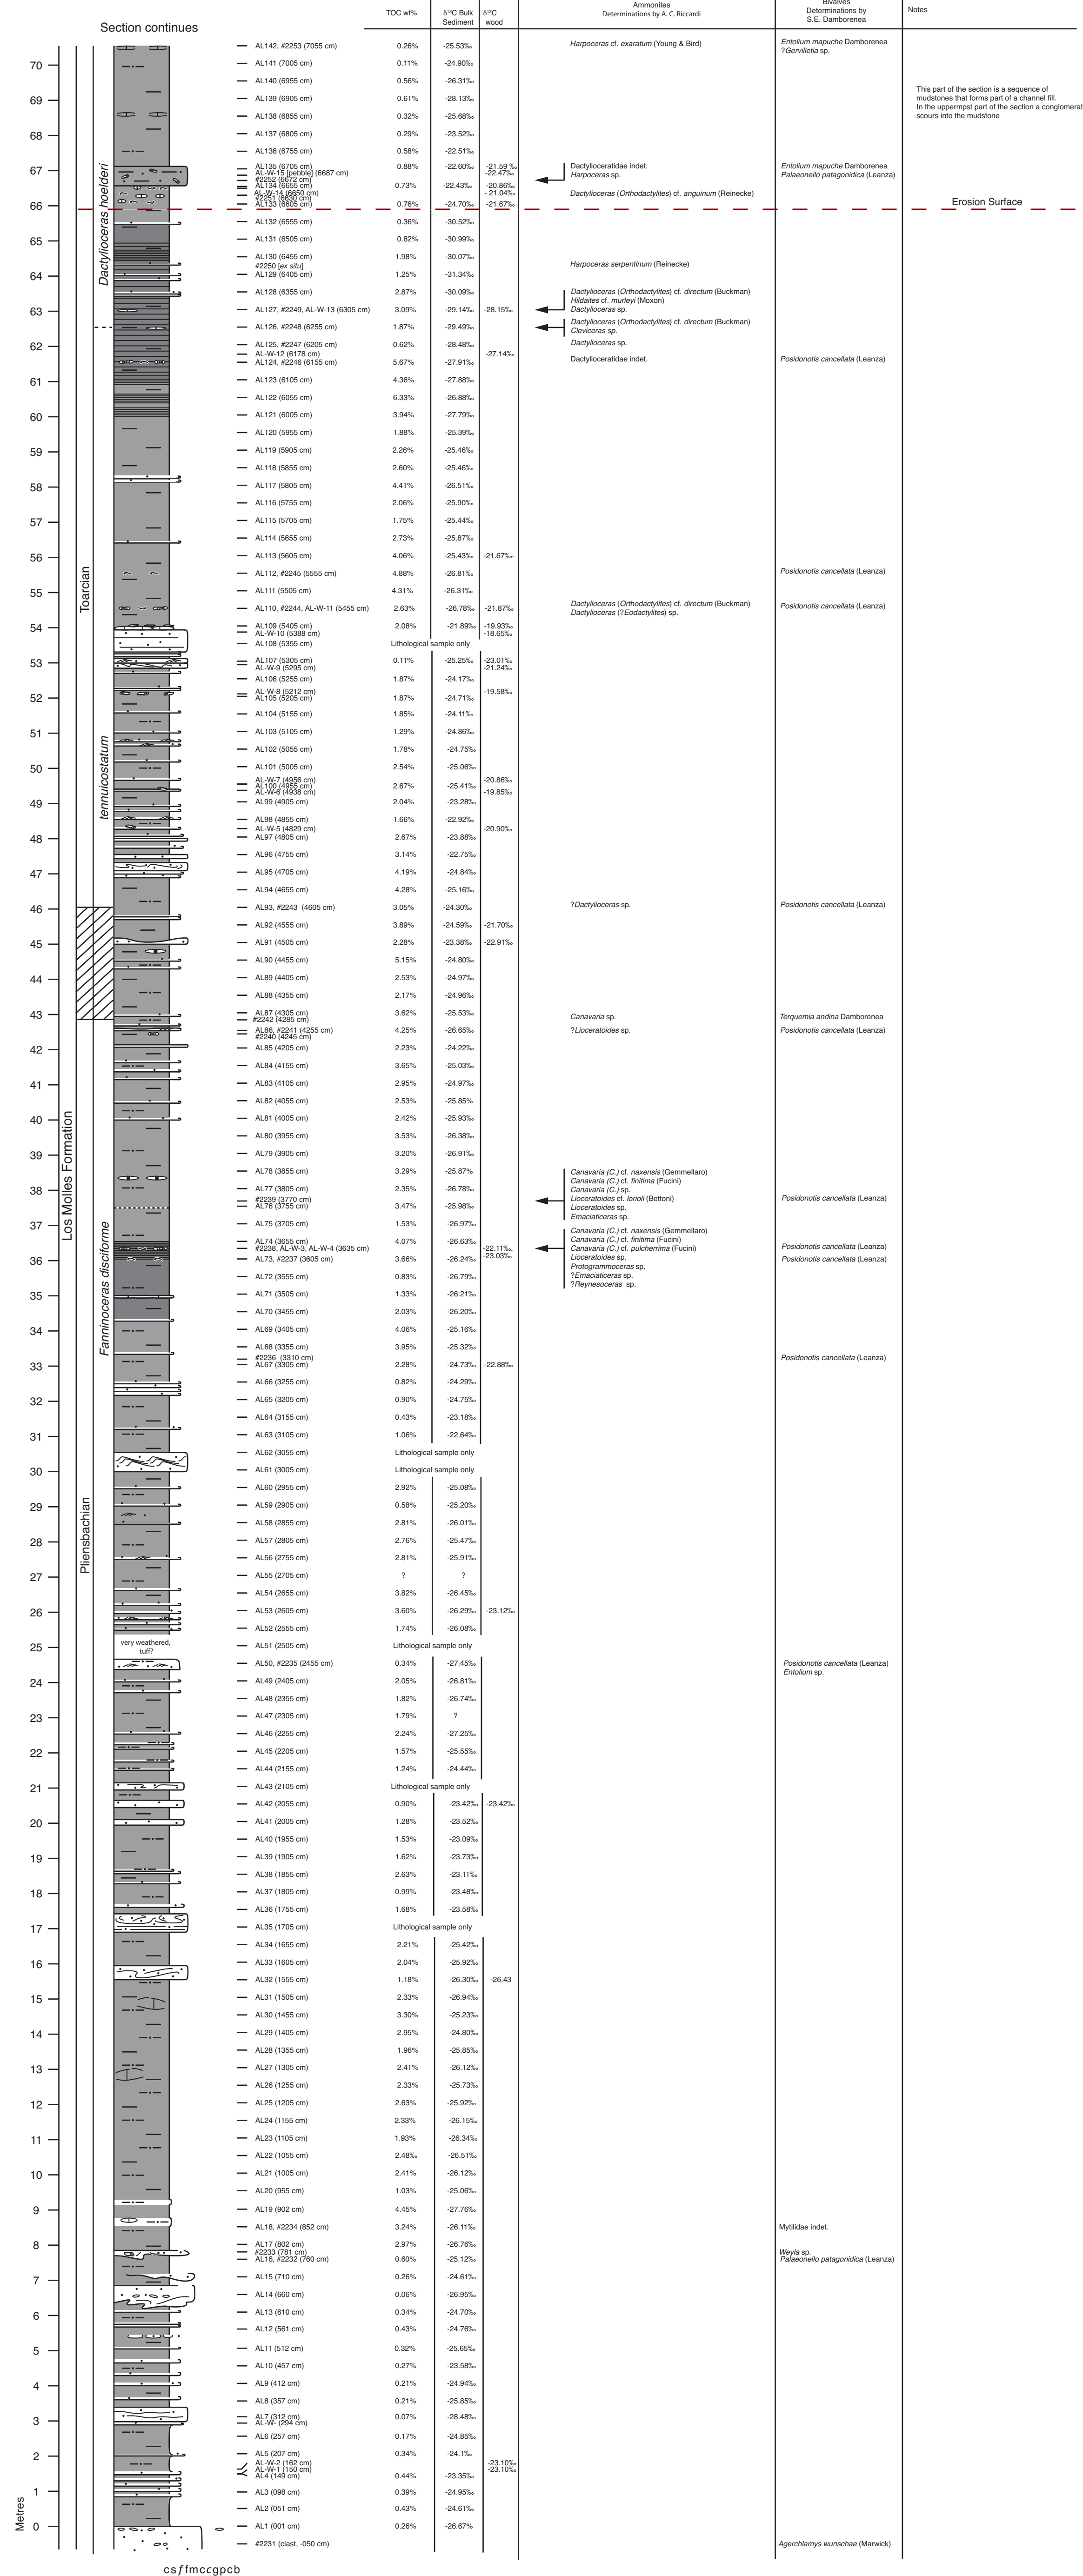

cs/f/mccgpcb sand
